# Supplementary material for: Architecture of the human interactome defines protein communities and disease networks
Source: Springer Nature journal article supplement (doi:10.1038/nature22366), 2017-05-01

## Supplemental Data Fig 1

Extended Data Fig. 2h,i

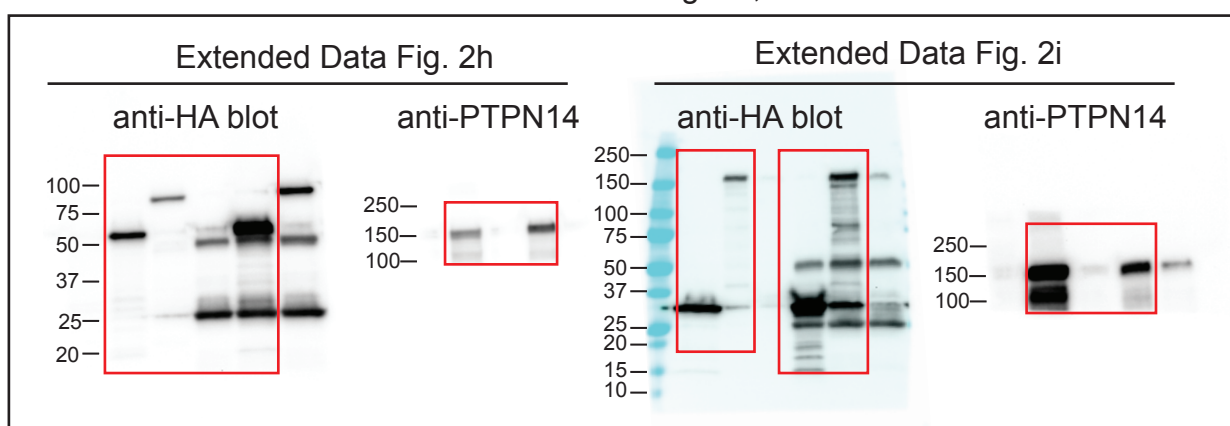

Extended Data Fig. 7l-n

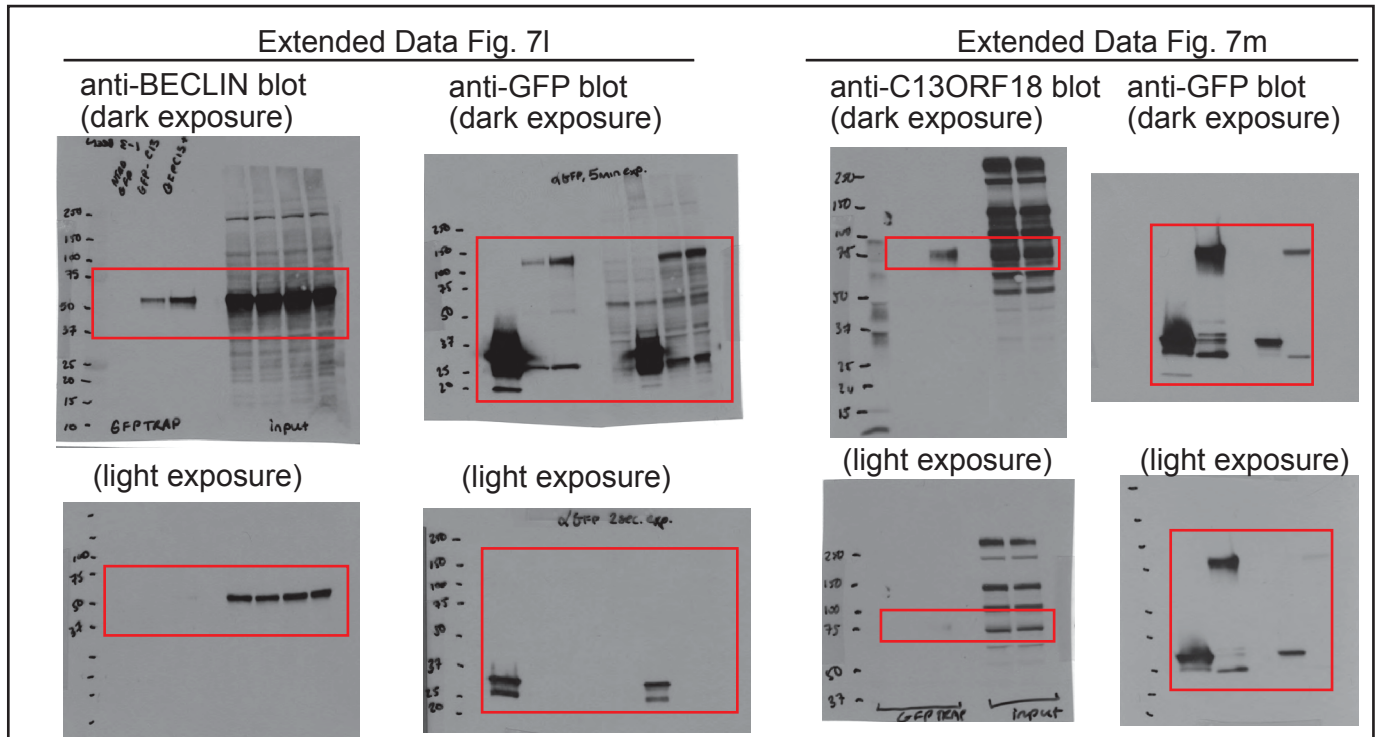

Extended Data Fig. 7n

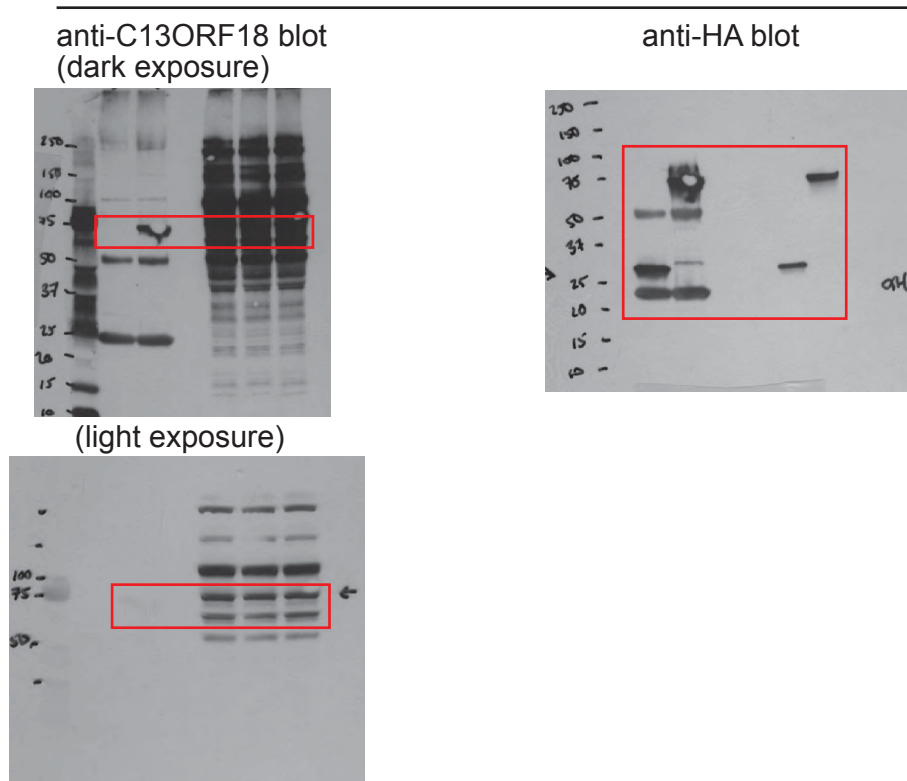

Extended Data Fig. 10a

anti-KIAA0196 +  
anti-PCNA blot

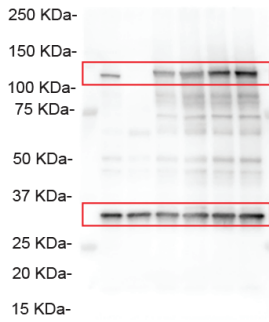

Extended Data Fig. 10d

anti-FLAG +  
anti-ACTIN blot

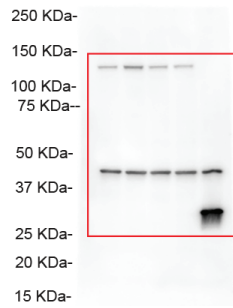

anti-KIAA1033 +  
anti-WASH1 +  
anti-CCDC53 blot

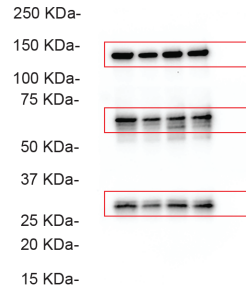

anti-FLAG blot

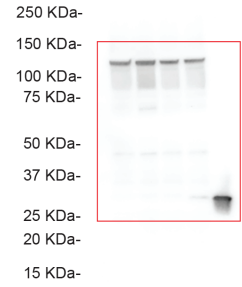

Supplement: 41586_2017_BFnature22366_MOESM1_ESM.pdf [file 41586_2017_BFnature22366_MOESM1_ESM.pdf]
